# Supplementary material for: New bioactive metabolites from the elicited marine sponge-derived bacterium Actinokineospora spheciospongiae sp. nov
Source: PubMed Central journal article supplement (PMC6345950; doi:10.1186/s13568-018-0730-0), 2019-01-24
Supplement: 13568_2018_730_MOESM1_ESM.pdf [file 13568_2018_730_MOESM1_ESM.pdf]

# **New bioactive metabolites from the elicited marine sponge-derived bacterium *Actinokineospora spheciospongiae* sp. nov.**

**Ahmed Tawfike<sup>1,2</sup>, Eman Zekry Attia<sup>3</sup>, Samar Yehia Desoukey<sup>3</sup>, Dina Hajjar<sup>4</sup>, Arwa A Makki<sup>4</sup>, Peter J. Schupp<sup>5\*</sup>, RuAngelie Edrada-Ebel<sup>1</sup>, and Usama Ramadan Abdelmohsen<sup>3\*</sup>**

<sup>1</sup> Strathclyde Institute of Pharmacy and Biomedical Sciences, University of Strathclyde, The John Arbuthnott Building, 27 Taylor Street, G4 0NR Glasgow, UK; ahmed.tawfike@rothamsted.ac.uk (A.T); ruangelie.edrada-ebel@strath.ac.uk (R. E)

<sup>2</sup> Department of Pharmacognosy, Faculty of Pharmacy, Helwan University, Cairo11753, Egypt

<sup>3</sup> Department of Pharmacognosy, Faculty of Pharmacy, Minia University, Minia 61519, Egypt; eman\_zekry@mu.edu.eg (E.Z.A); drsamaryehia@gmail.com (S.Y.D); usama.ramadan@mu.edu.eg (U.R.A)

<sup>4</sup> Department of Biochemistry, faculty of Science, Center for Science and medical research, University of Jeddah, 80203 Jeddah, Saudi Arabia; Dhajjar@uj.edu.sa (D.H); amaki@uj.edu.sa (A.A.M)

<sup>5</sup> Carl-von-Ossietzky University Oldenburg, Institute for Chemistry and Biology of the marine Environment, Postfach 2503, 26111 Oldenburg, Germany; peter.Schupp@uni-oldenburg.de

\* Correspondence: usama.ramadan@mu.edu.eg, Tel.: +2-86-2347759, Fax: +2-86-2369075 (URA); peter.schupp@uni-oldenburg.de, Tel.: ++49 (0) 4421- 944-100, Fax: +49 (0) 4421- 944-140 (PJS)

Fridamycin H ESI Positive 0911

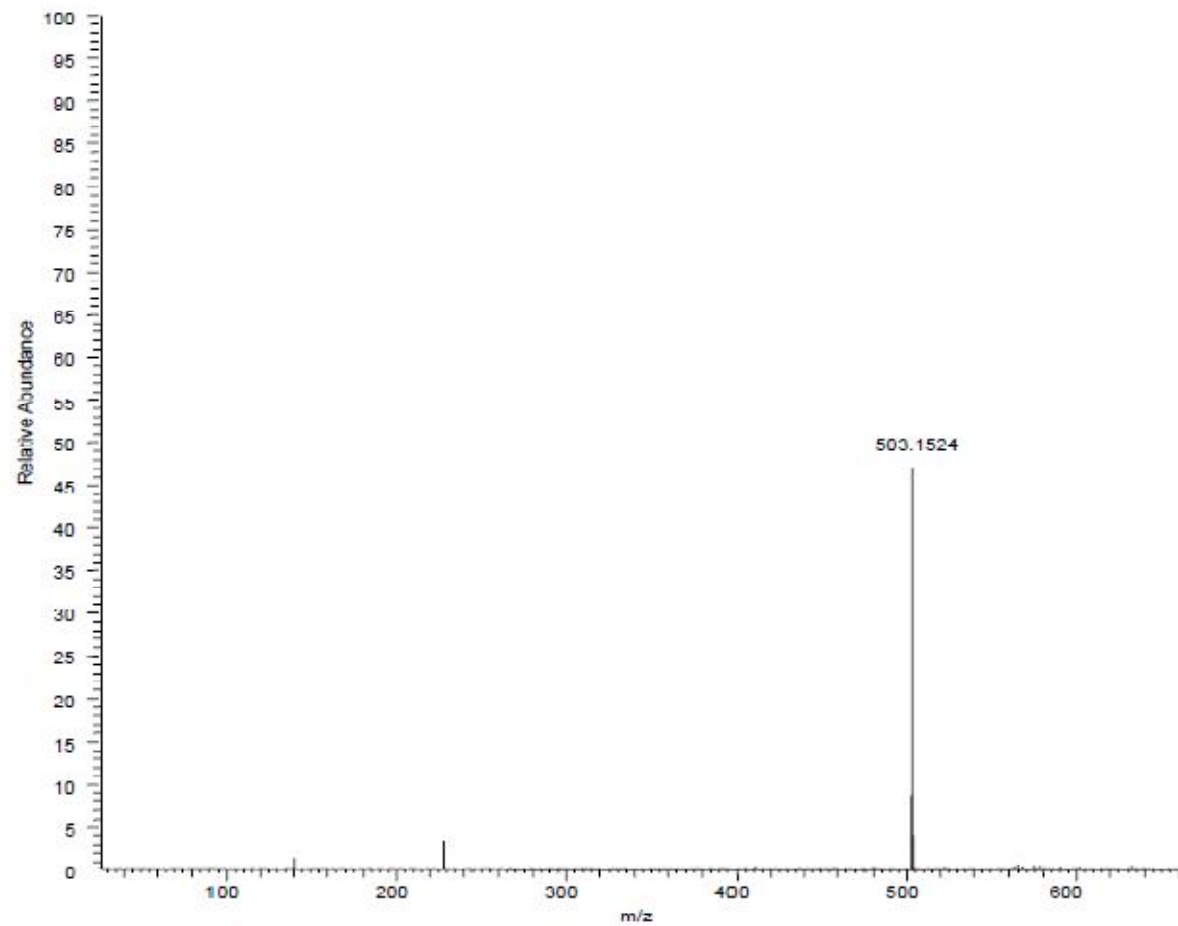

**Figure S1. HR-ESIMS spectrum of compound 1 (Fridamycin H)**

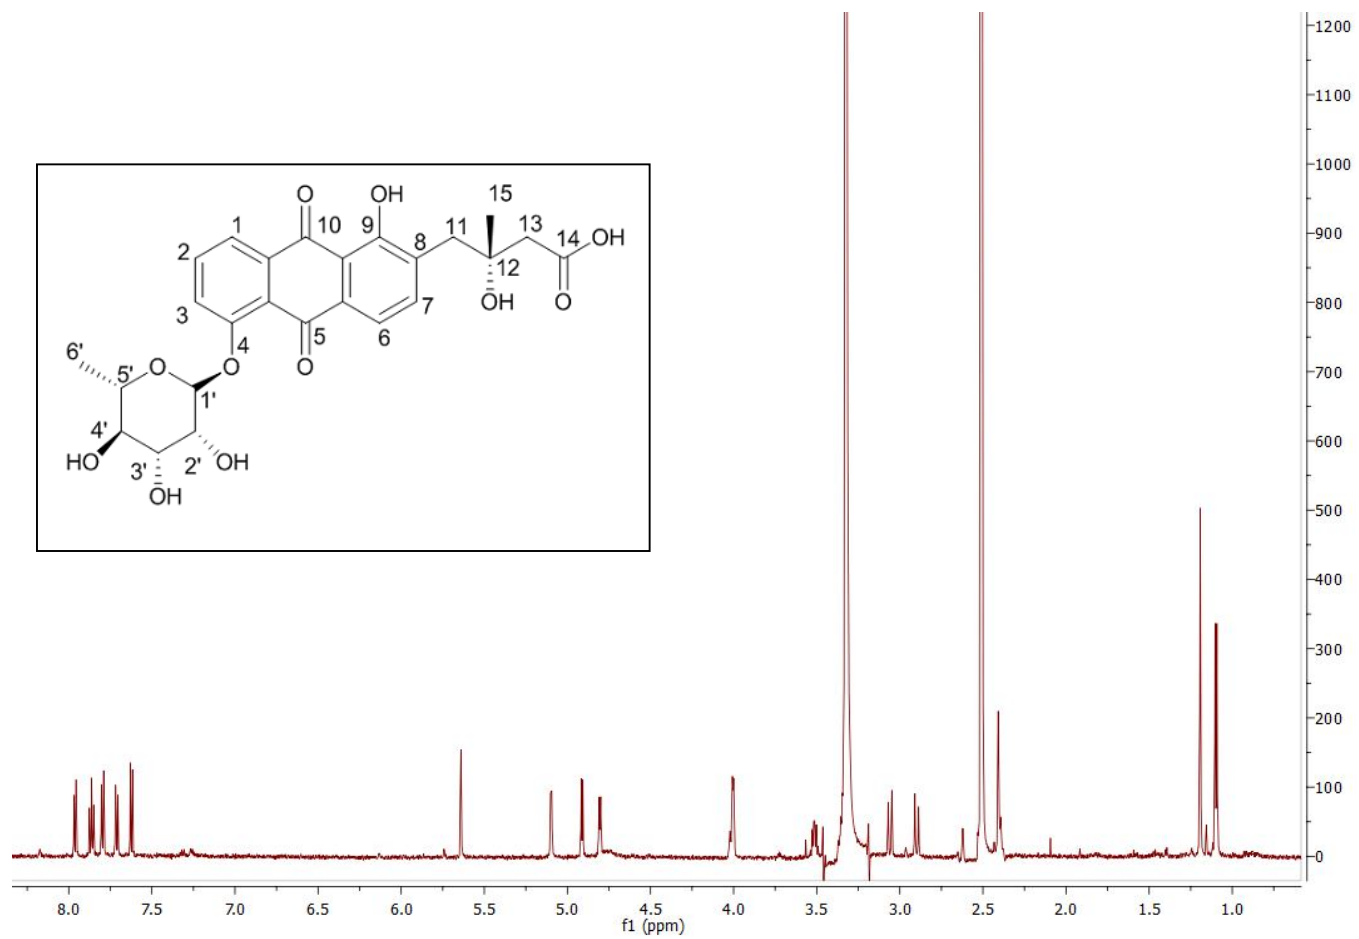

Figure S2.  $^1\text{H-NMR}$  spectrum of compound 1 (Fridamycin H) in  $\text{DMSO-}d_6$  (600 MHz)

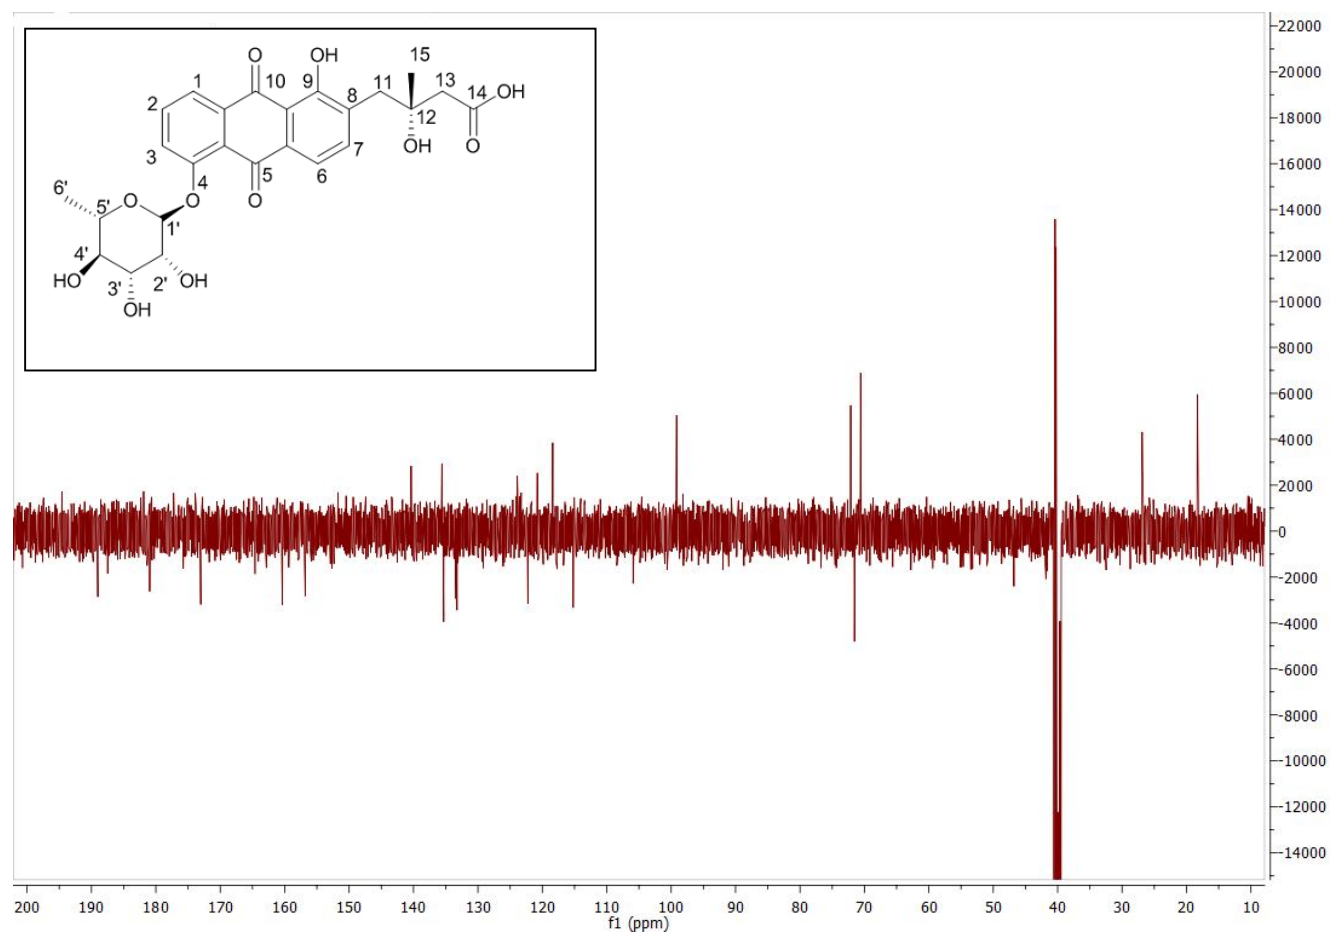

Figure S3.  $^{13}\text{C}$ -NMR spectrum of compound 1 (Fridamycin H) in  $\text{DMSO-}d_6$  (150 MHz)

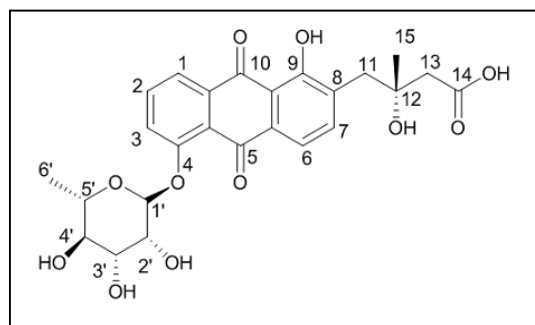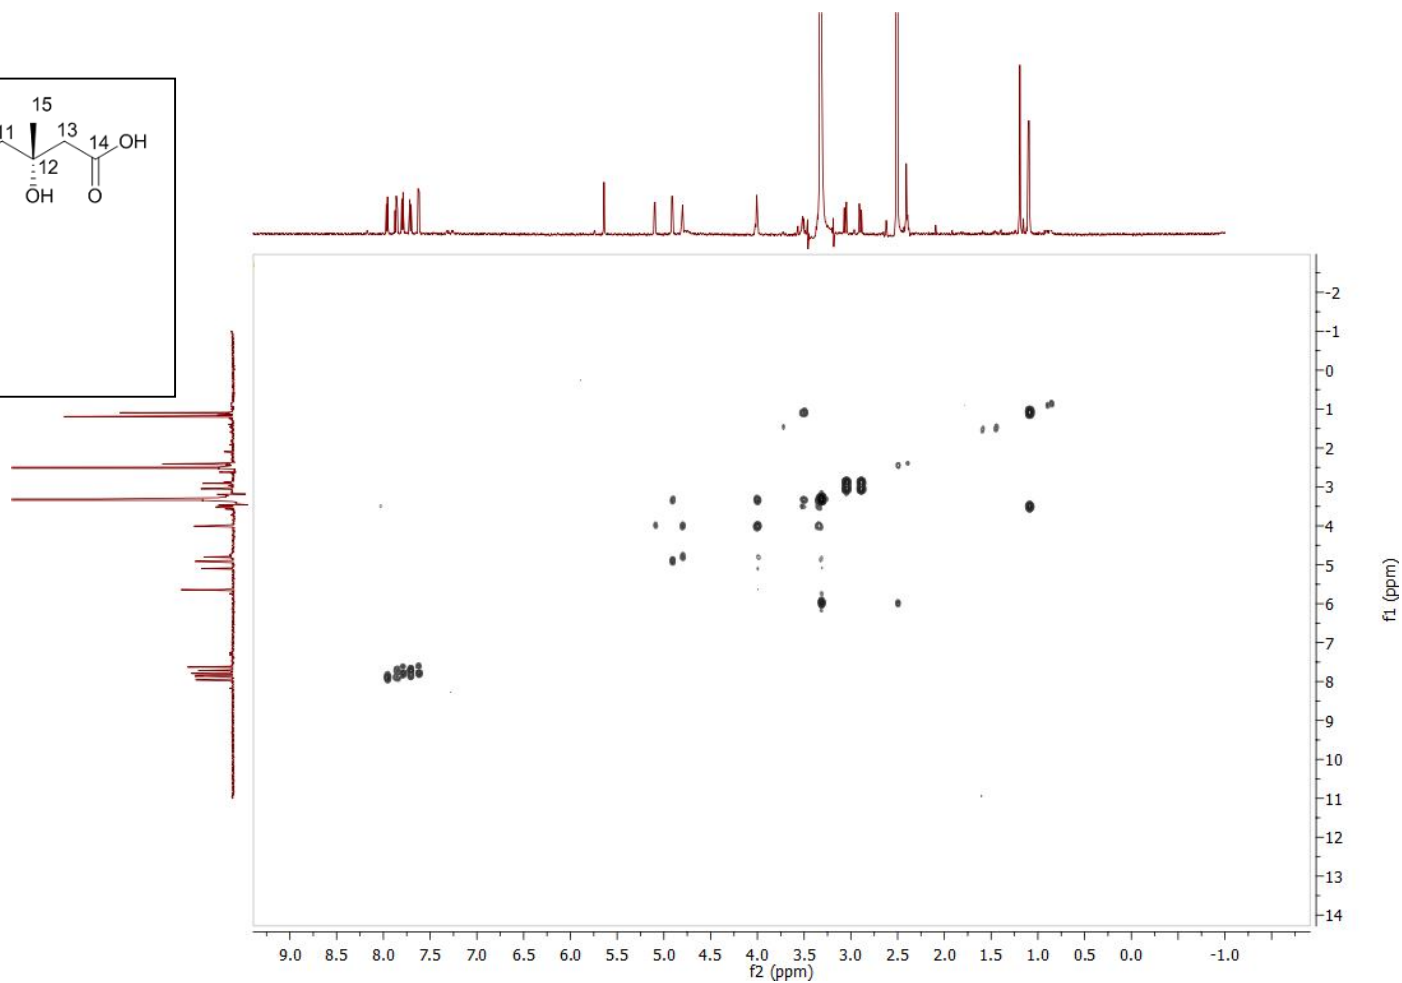

Figure S4:  $^1\text{H}$ - $^1\text{H}$  COSY spectrum of compound 1 (Fridamycin H) in  $\text{DMSO-}d_6$

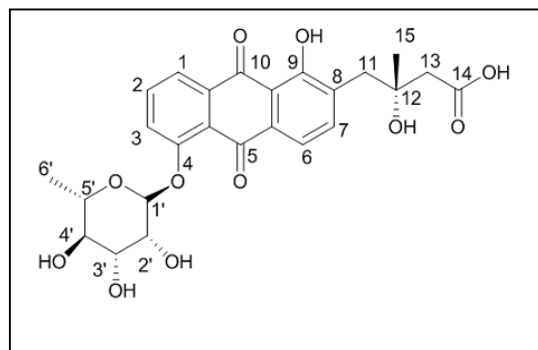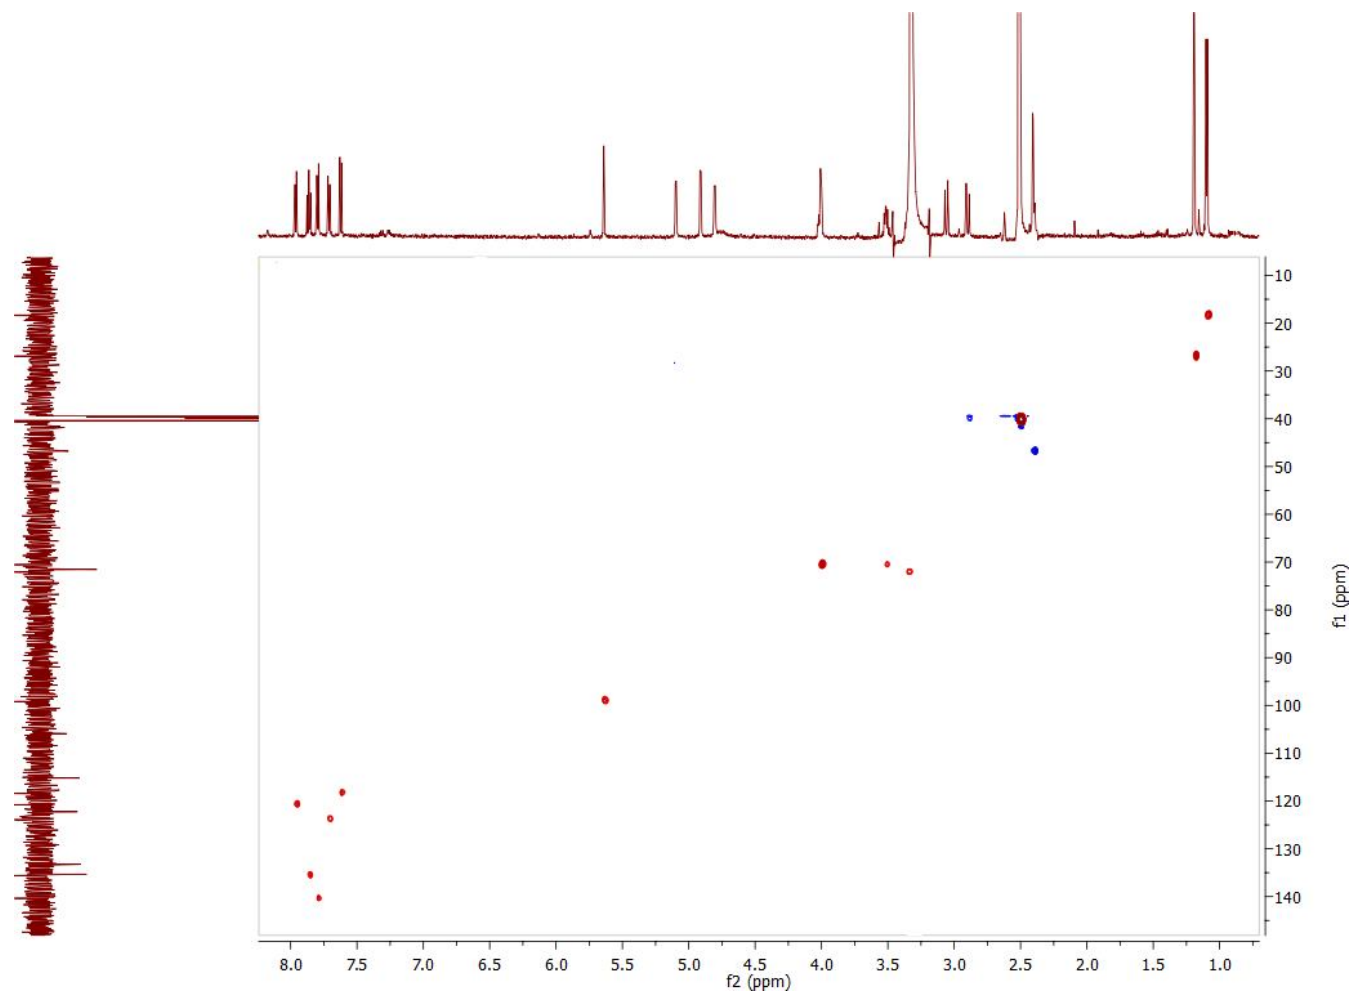

Figure S5: HSQC spectrum of compound 1 (Fridamycin H) in DMSO-*d*<sub>6</sub>

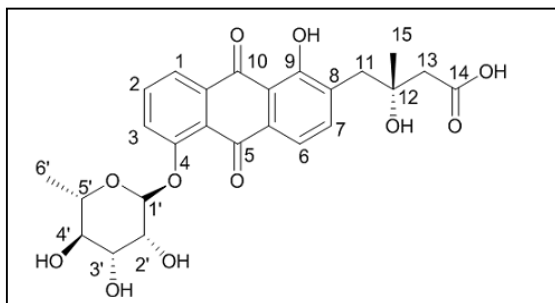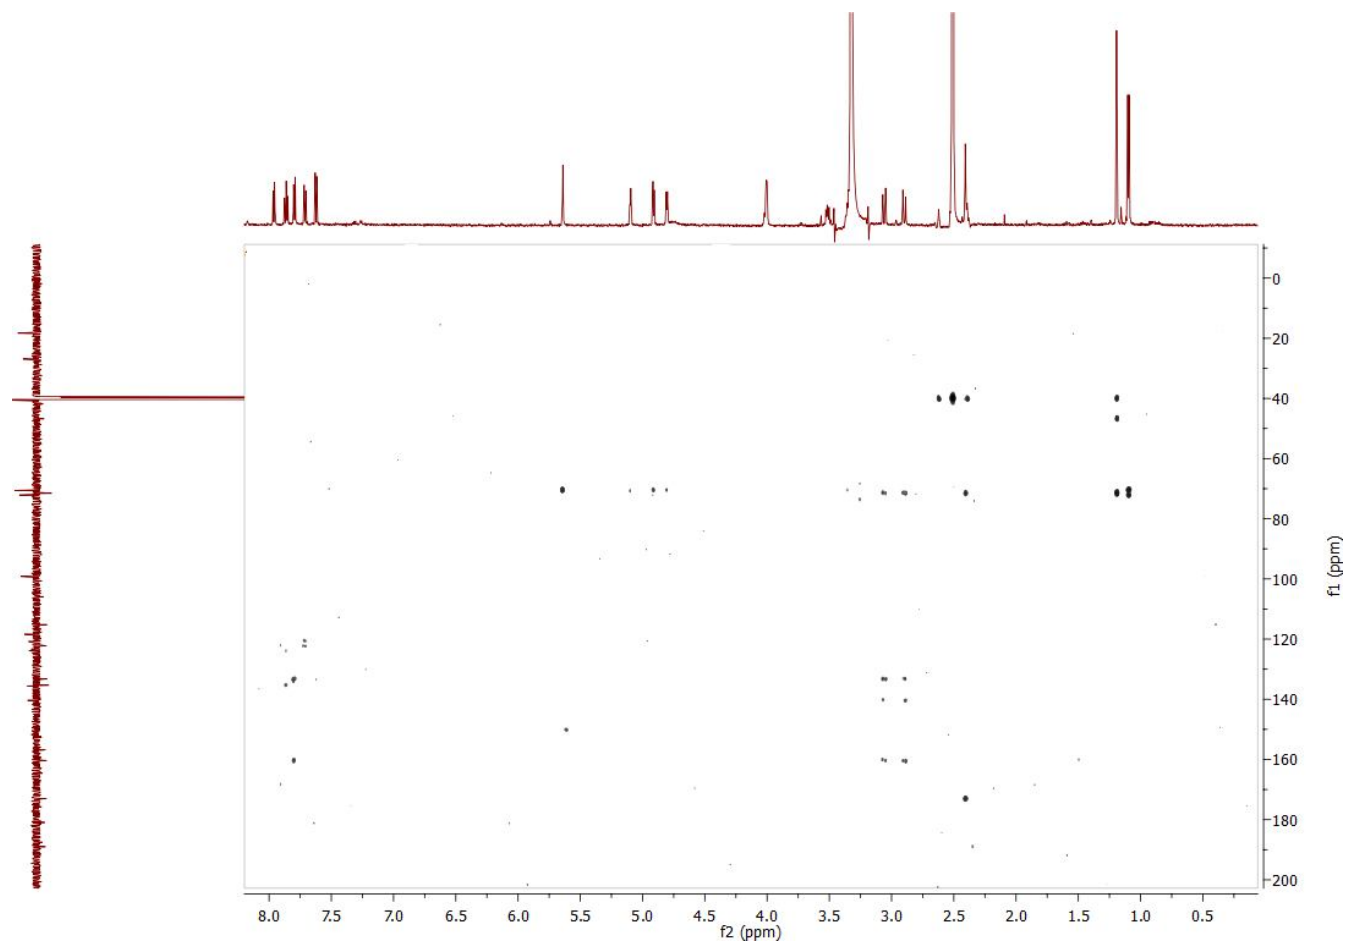

Figure S6: HMBC spectrum of compound 1 (Fridamycin H) in DMSO-*d*<sub>6</sub>

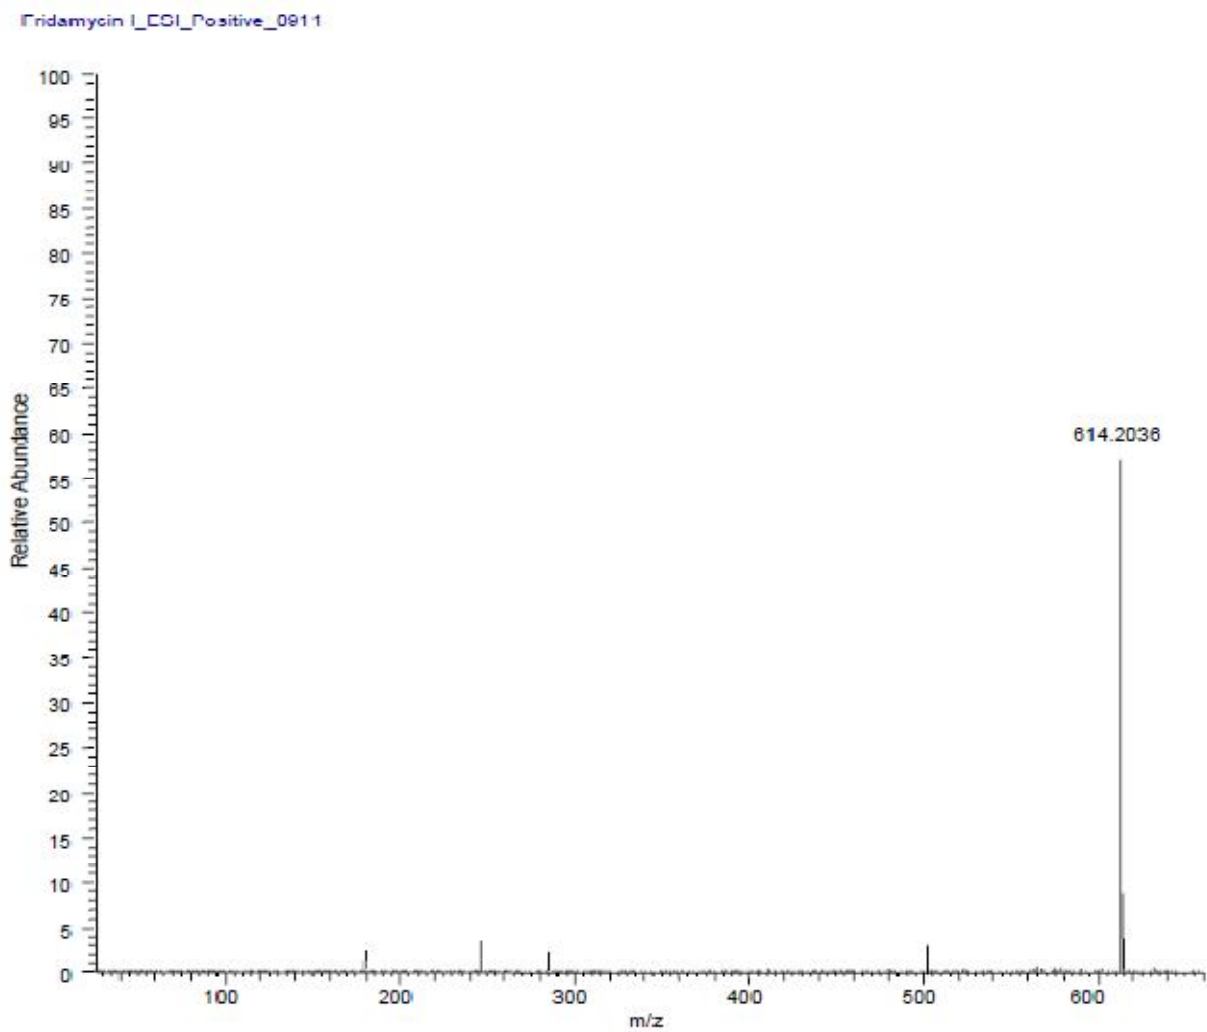

**Figure S7. HR-ESIMS spectrum of compound 2 (Fridamycin I)**



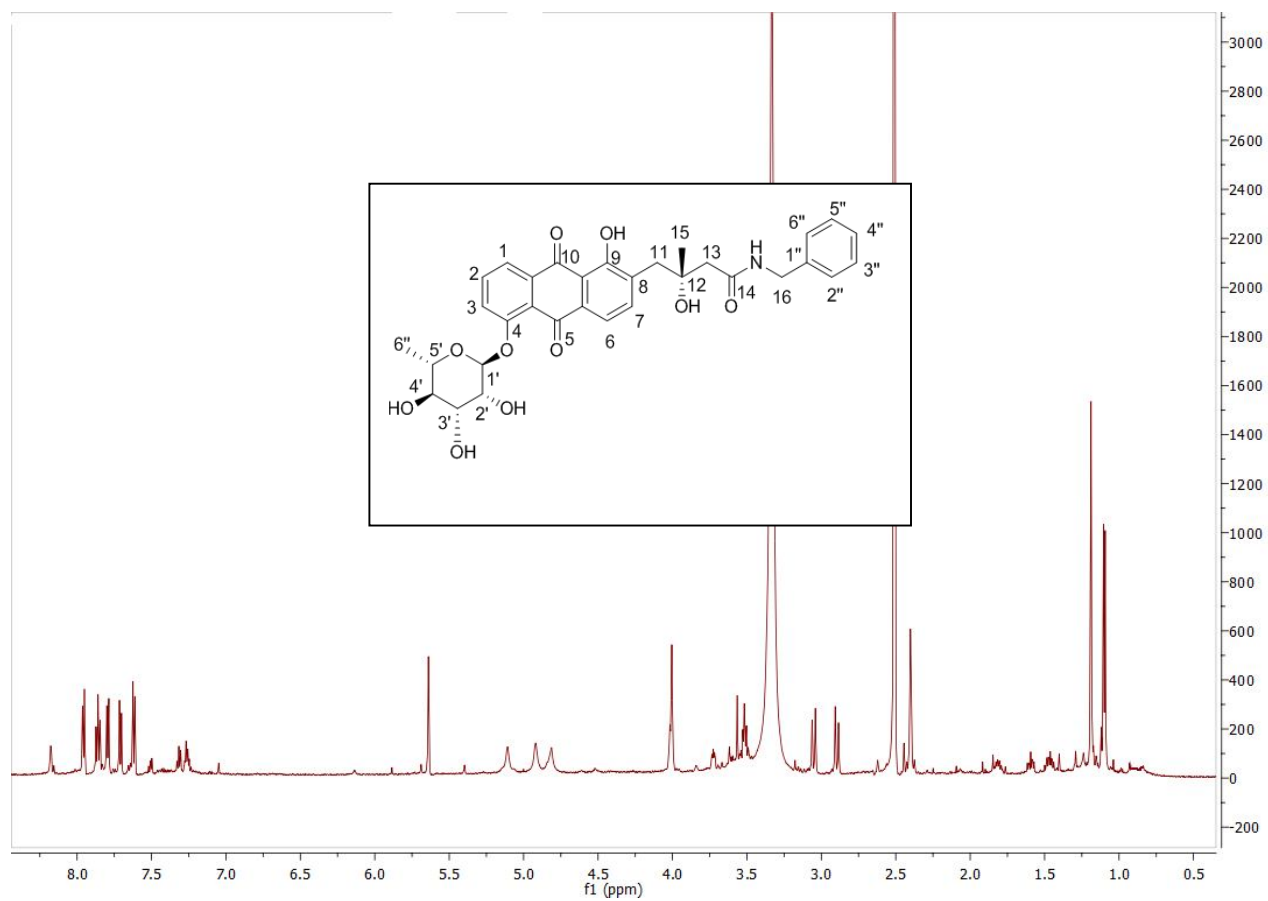

Figure S8. <sup>1</sup>H-NMR spectrum of compound 2 (Fridamycin I) in DMSO-*d*<sub>6</sub> (600 MHz)

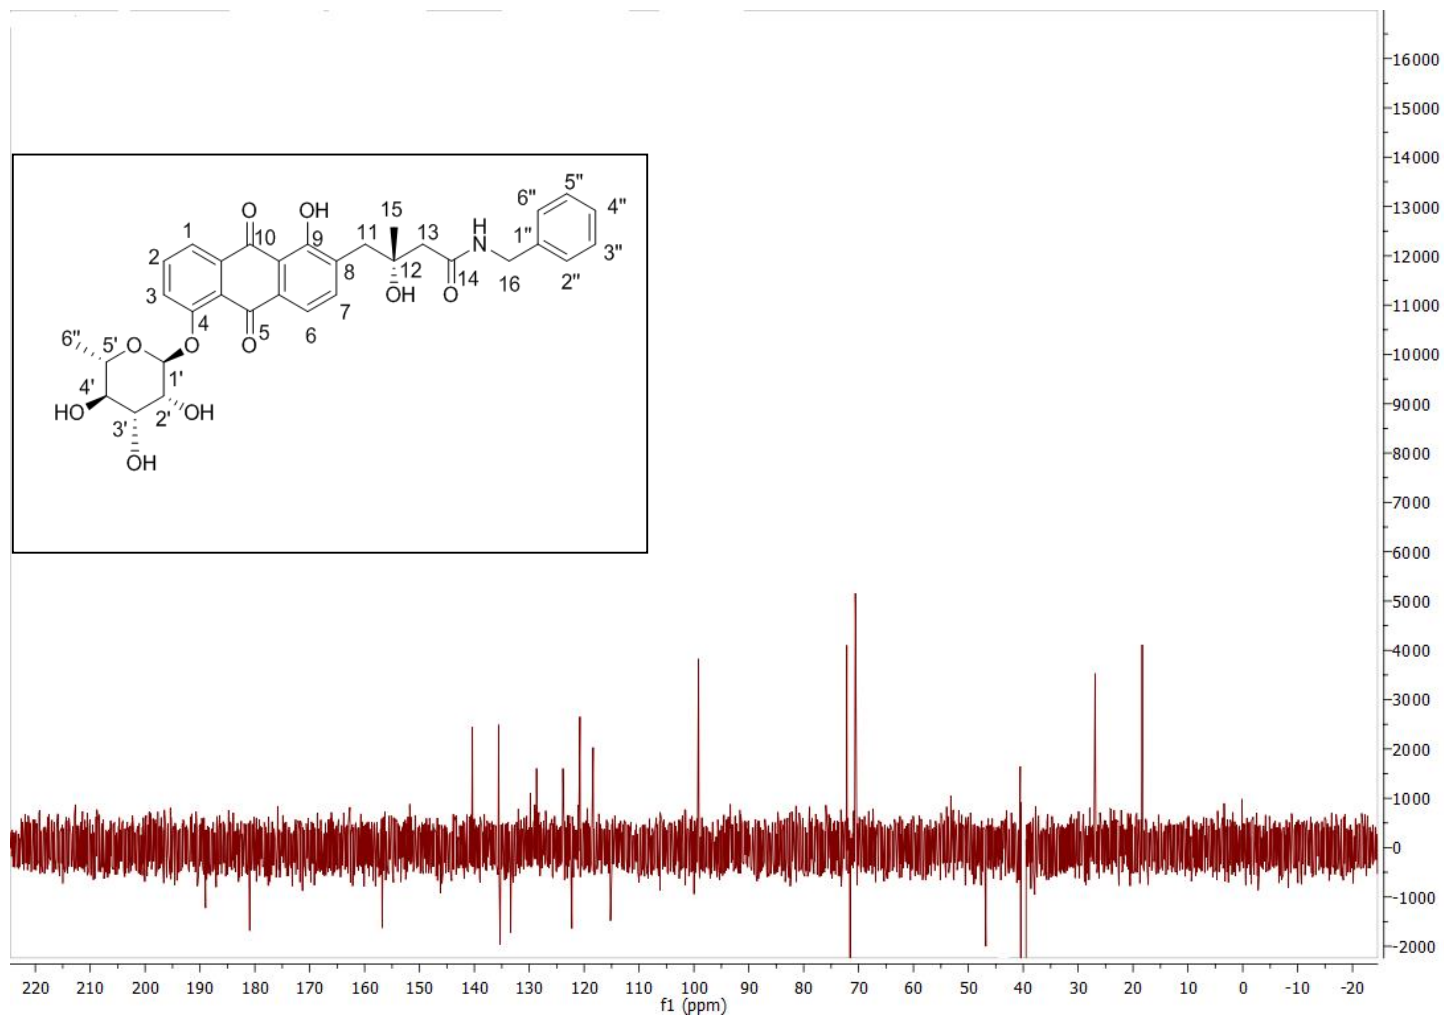

Figure S9.  $^{13}\text{C}$ -NMR spectrum of compound 2 (Fridamycin I) in  $\text{DMSO-}d_6$  (150 MHz)

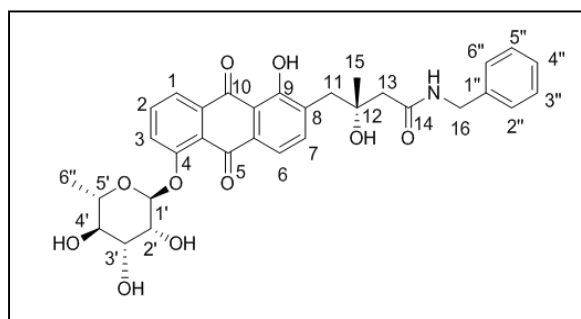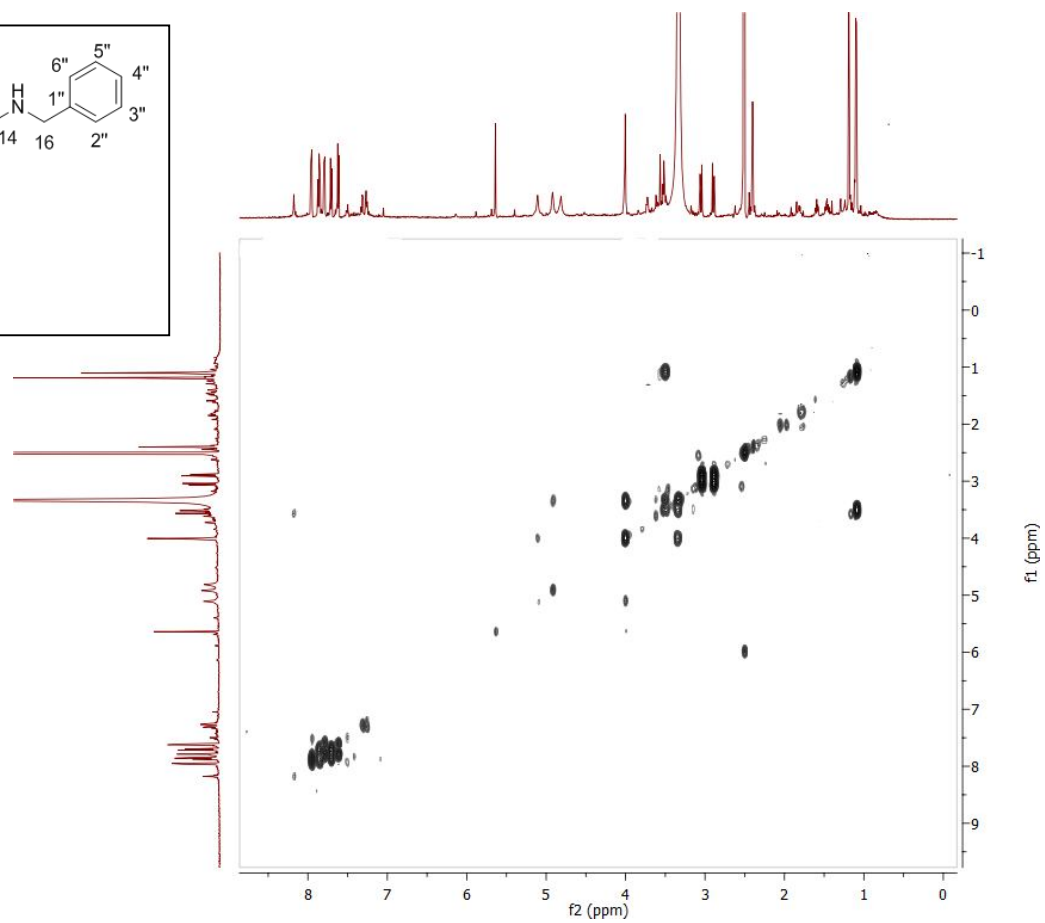

Figure S10:  $^1\text{H}$ - $^1\text{H}$  COSY spectrum of compound 2 (Fridamycin I) in DMSO- $d_6$

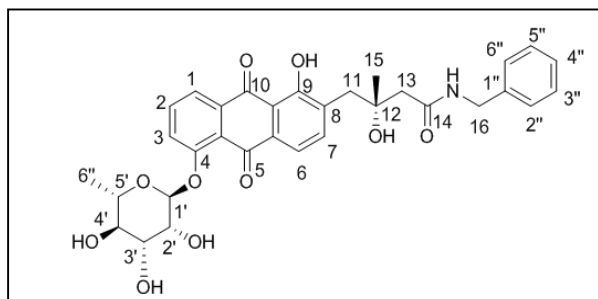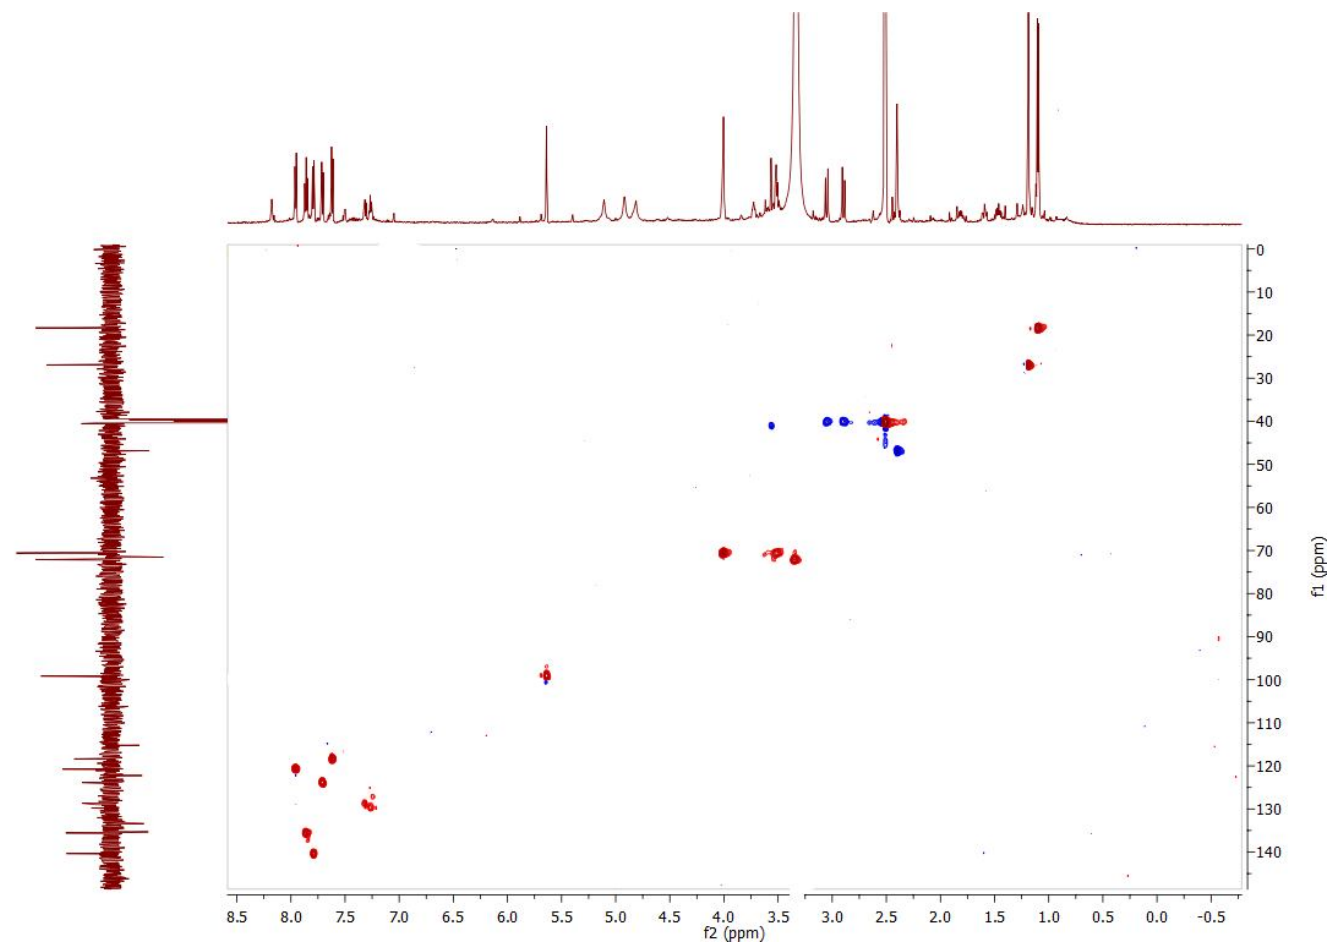

**Figure S11: HSQC spectrum of compound 2 (Fridamycin I) in DMSO-*d*<sub>6</sub>**

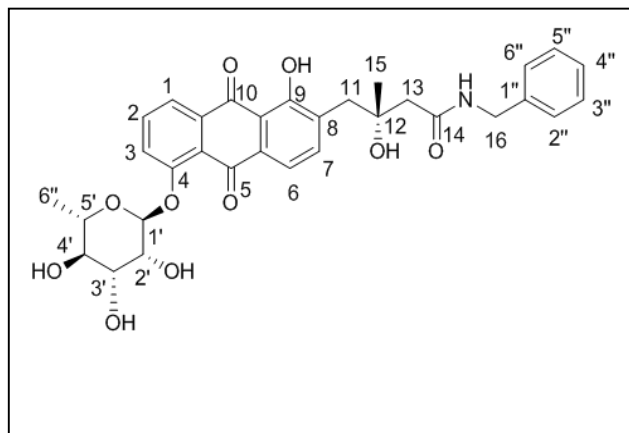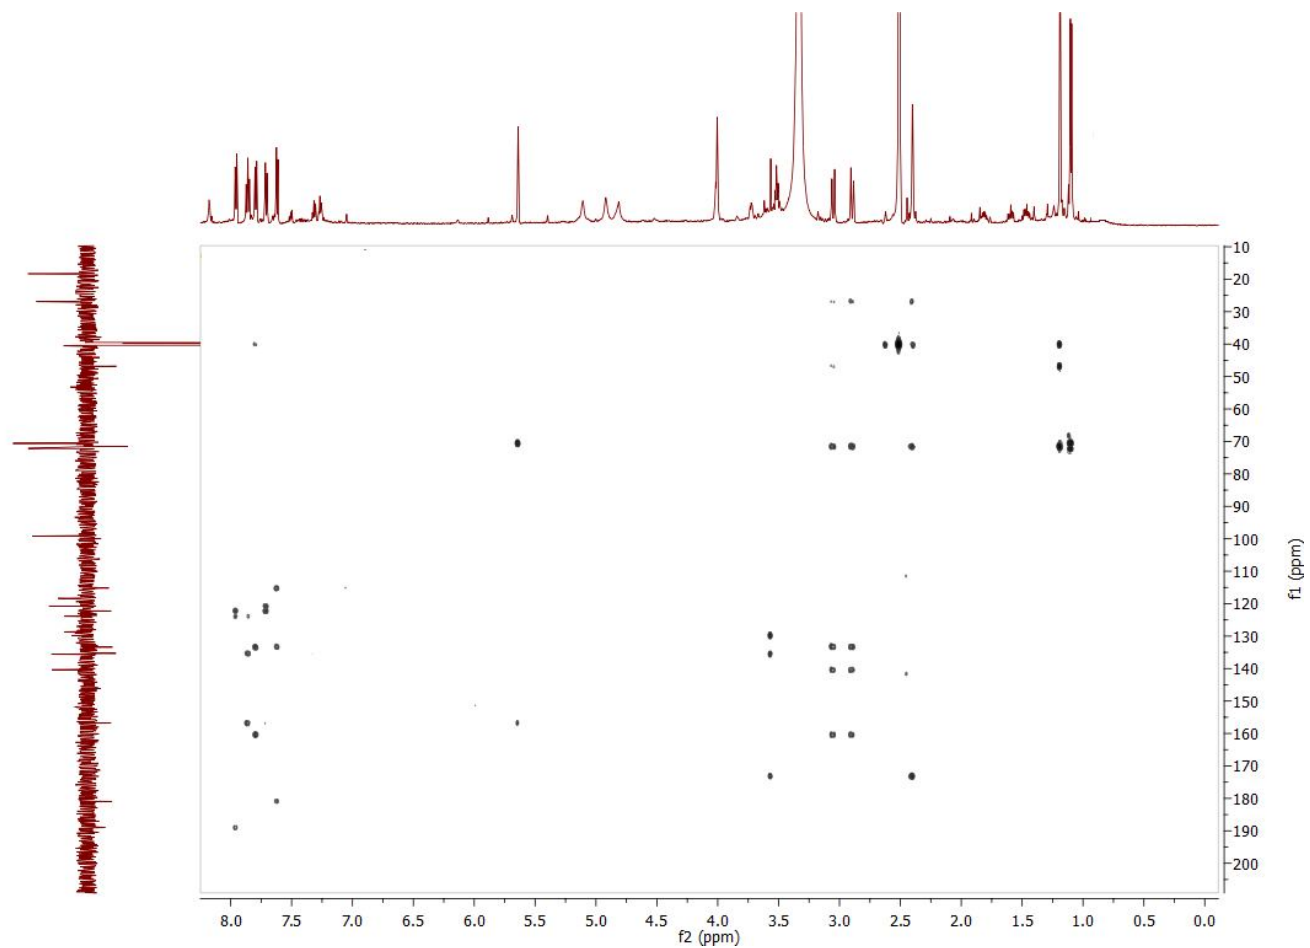

Figure S12: HMBC spectrum of compound 2 (Fridamycin I) in DMSO-*d*<sub>6</sub>

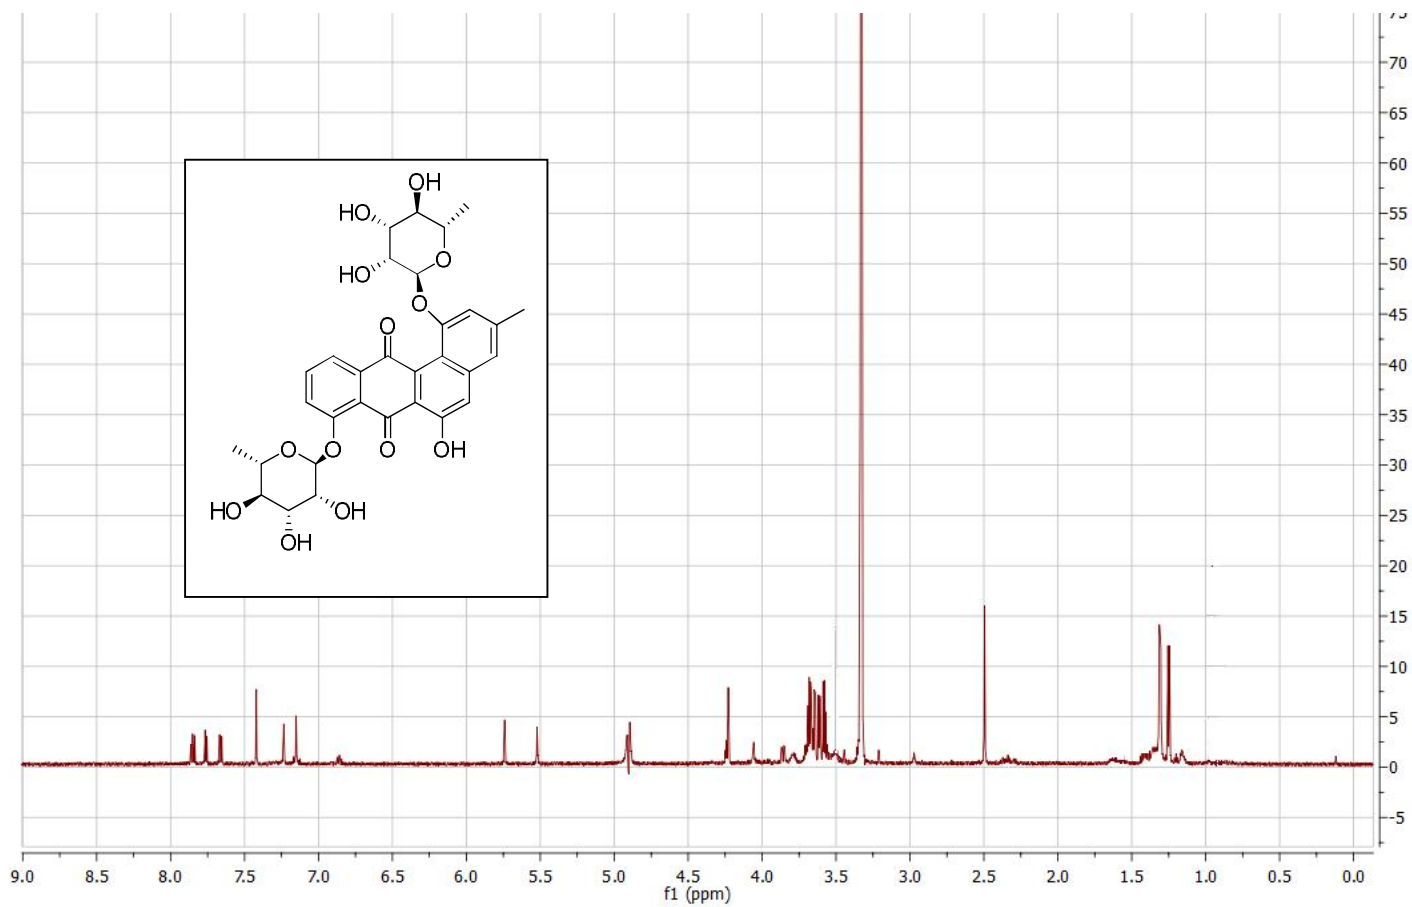

**Figure S13: <sup>1</sup>H-NMR spectrum of Actinosporin C in MeOD (600 MHz)**

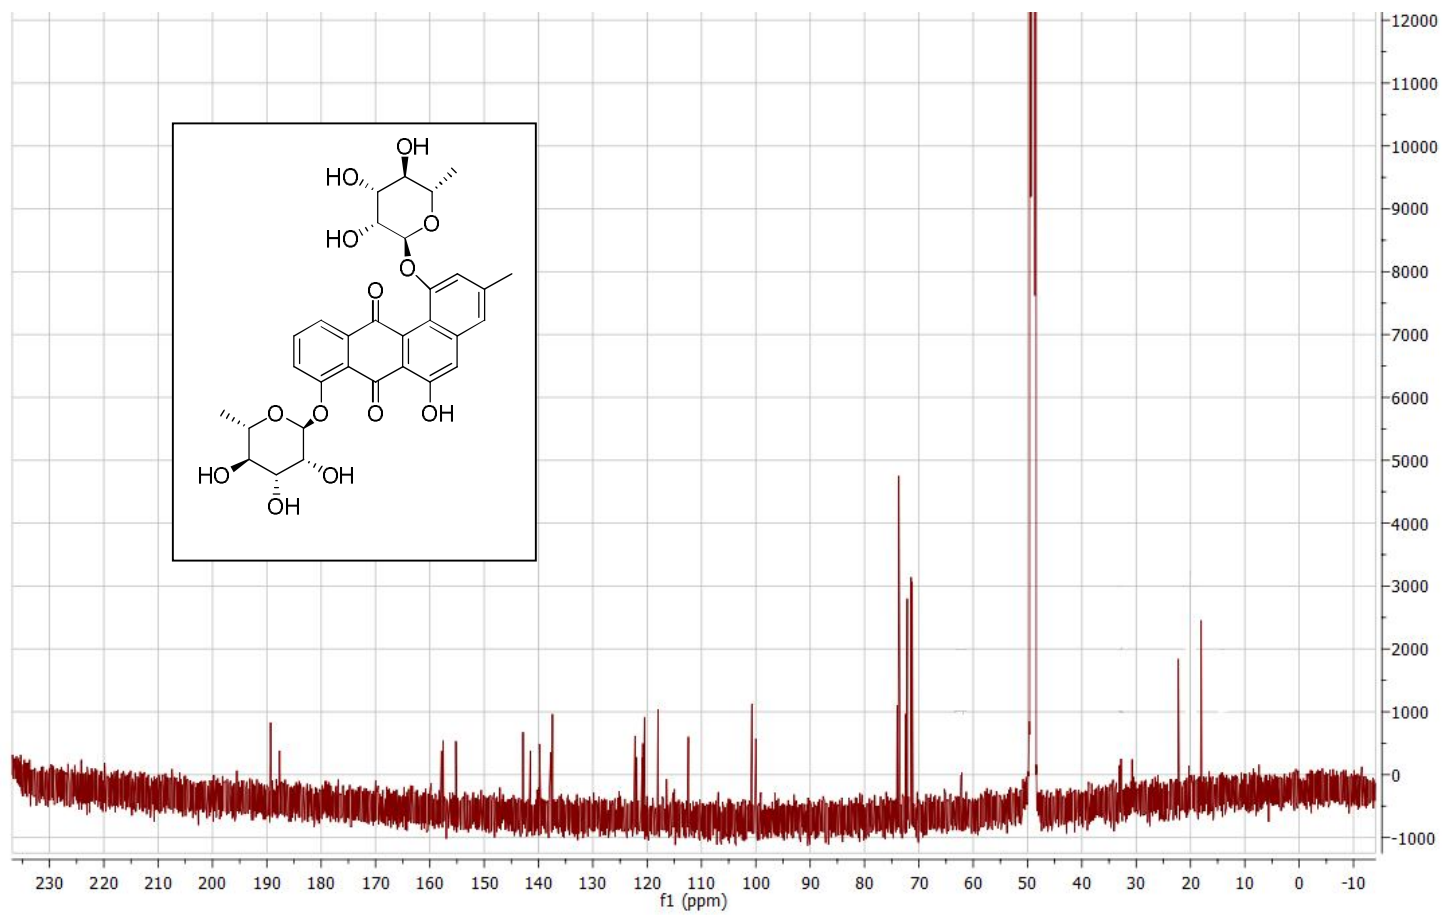

Figure S14:  $^{13}\text{C}$ -NMR spectrum of Actinosporin C in MeOD (150 MHz)

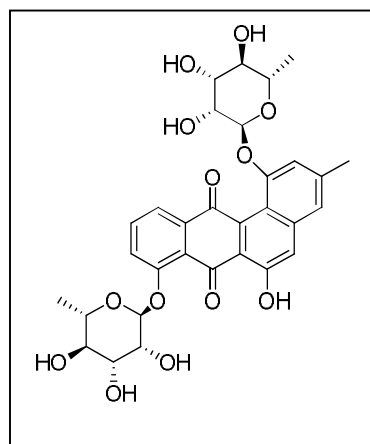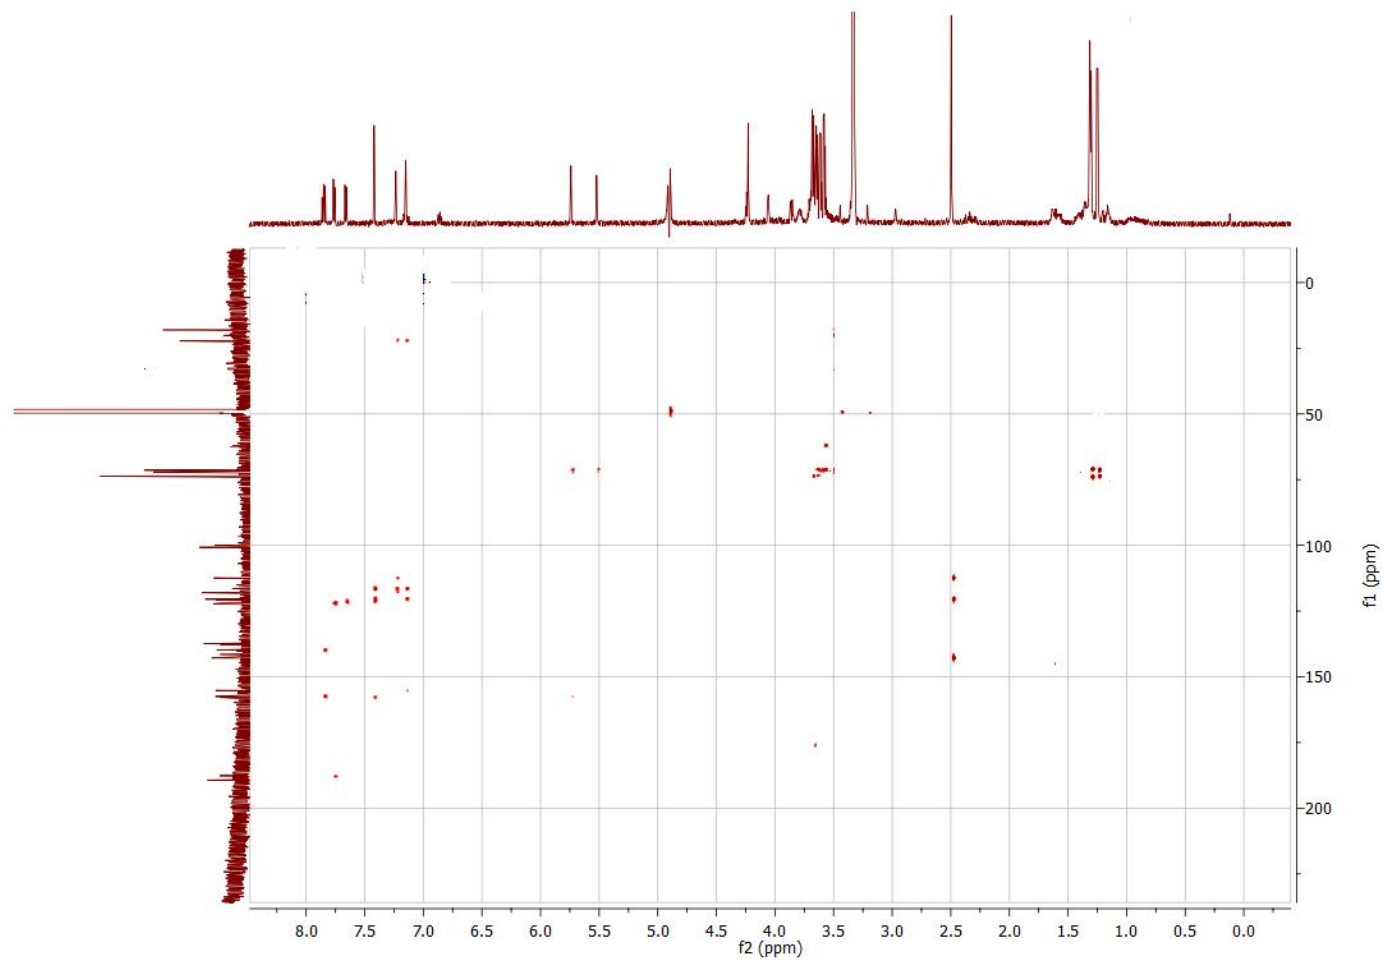

**Figure S15: HBMBC spectrum of Actinosporin C in MeOD**



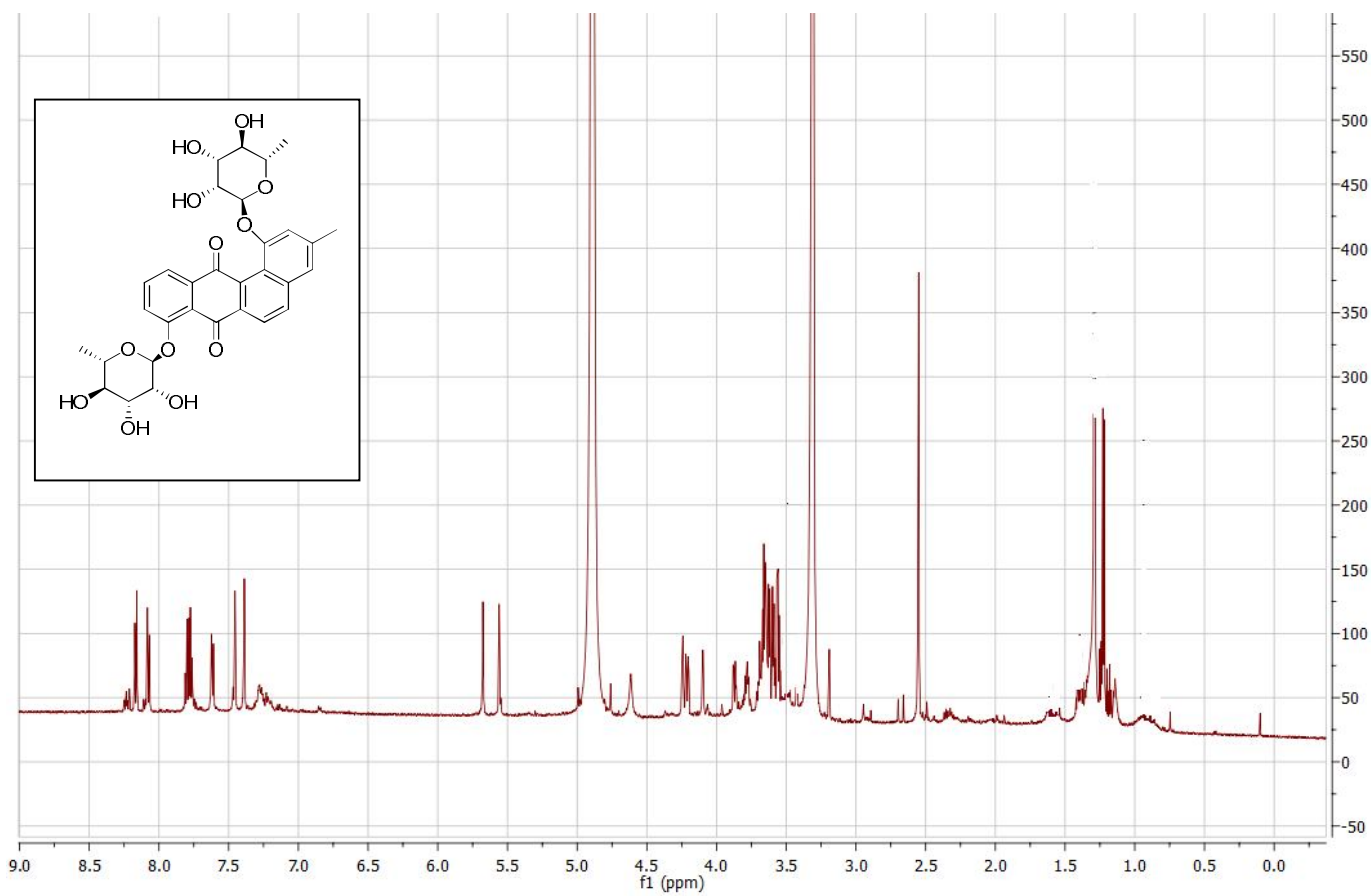

**Figure S16:  $^1\text{H-NMR}$  spectrum of Actinosporin D in  $\text{MeOD}$  (600 MHz)**

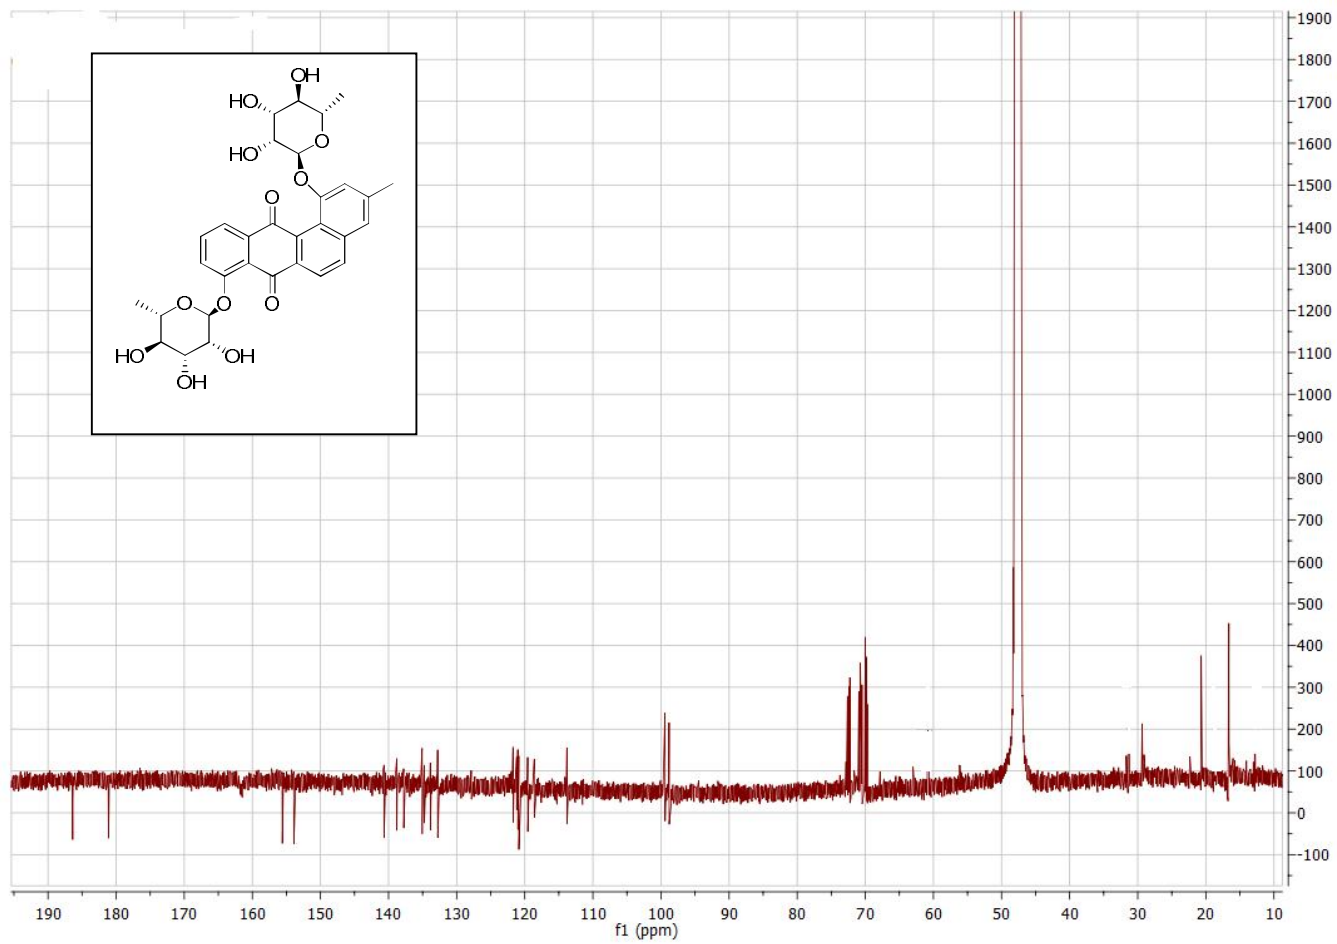

Figure S17:  $^{13}\text{C}$ -NMR spectrum of Actinosporin D in MeOD (150 MHz)

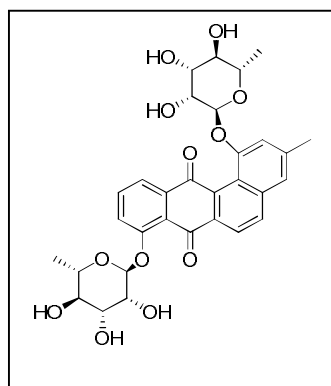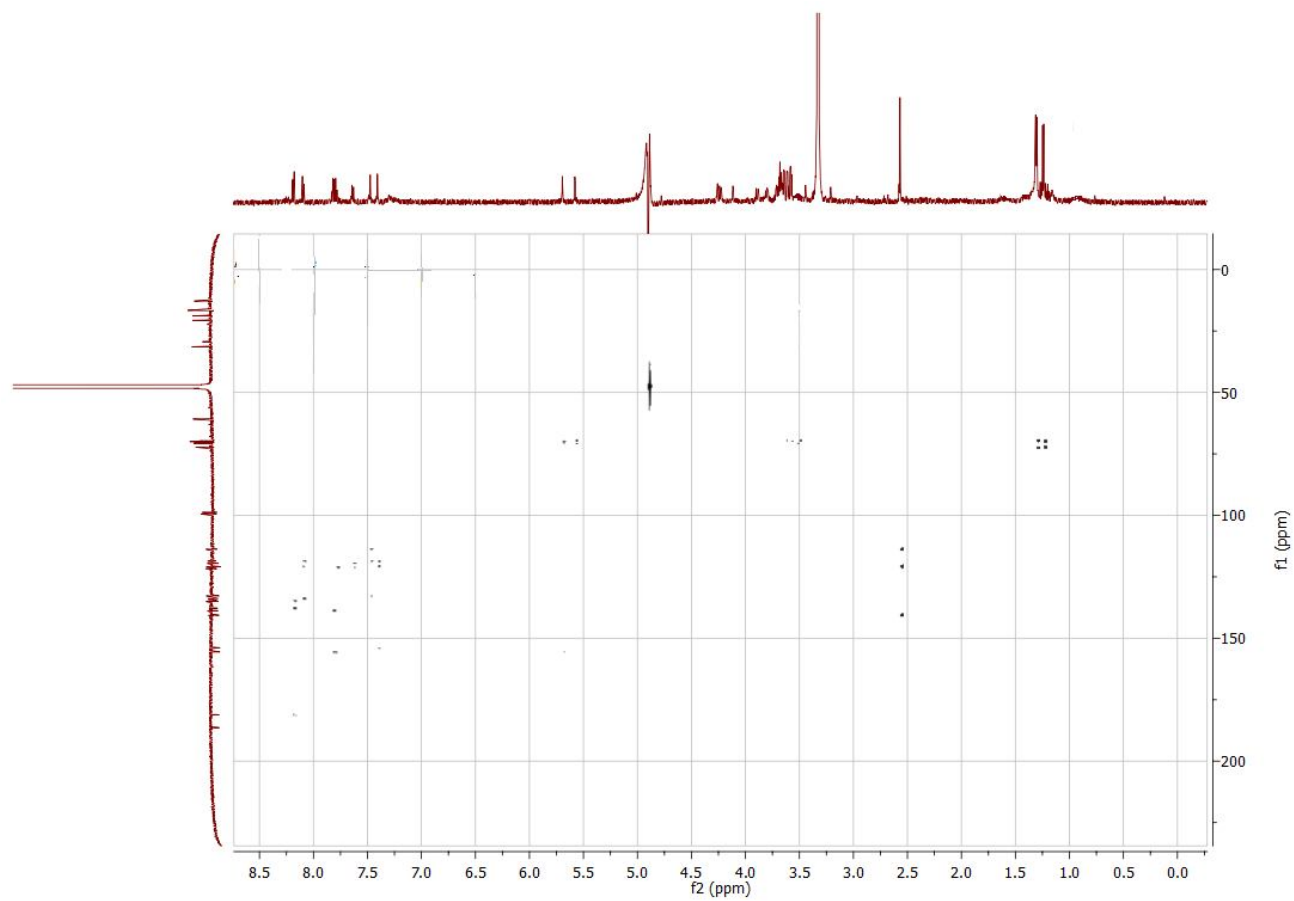

Figure S18: HBMBC spectrum of Actinosporin D in MeOD

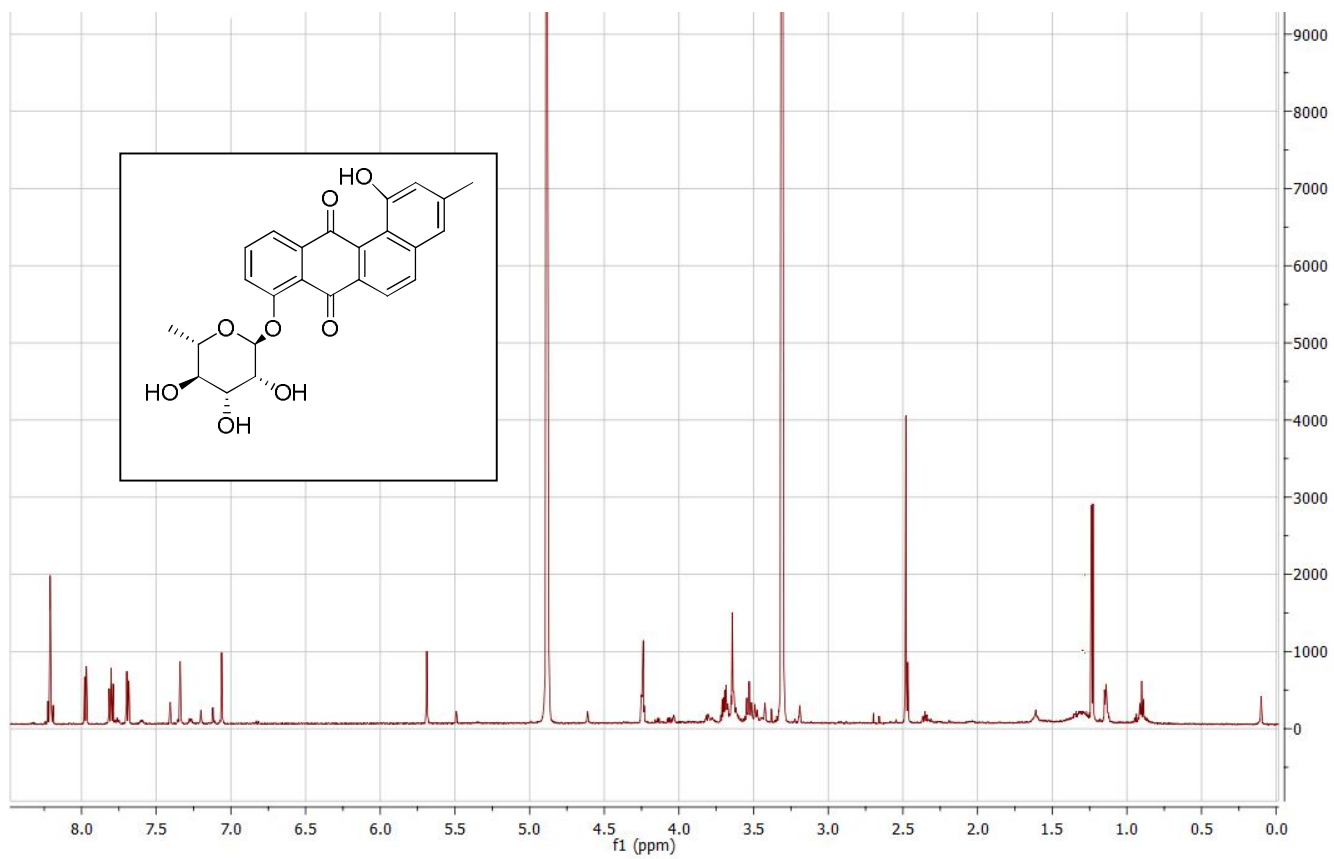

**Figure S19: <sup>1</sup>H-NMR spectrum of Actinosporin G in MeOD (600 MHz)**

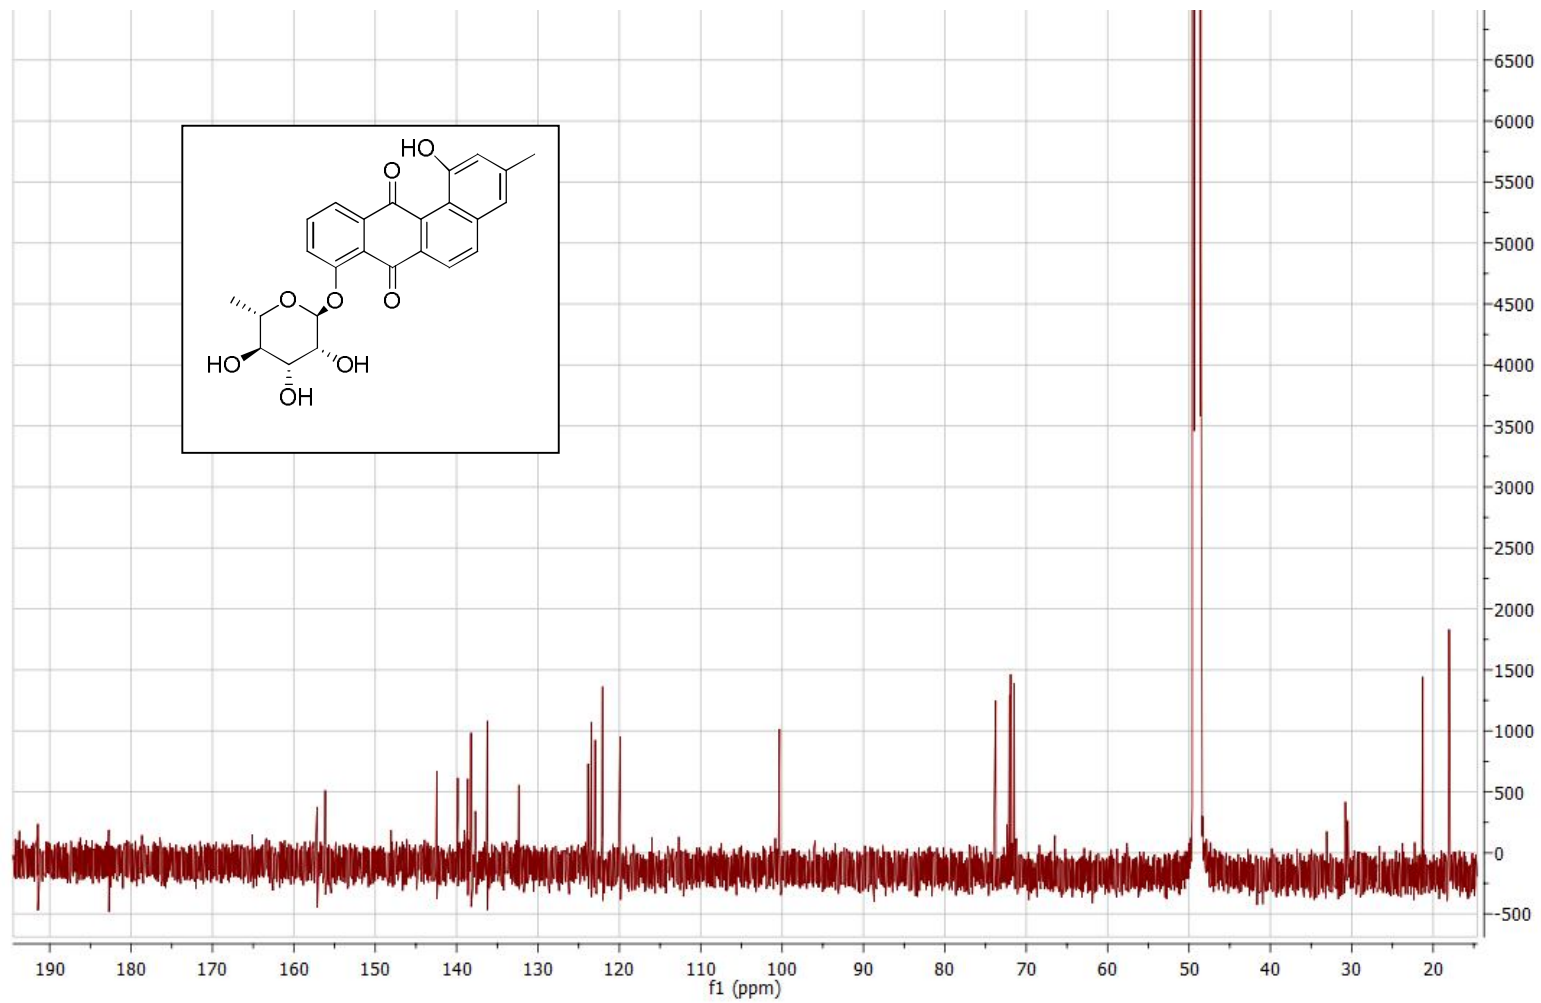

**Figure S20:**  $^{13}\text{C}$ -NMR spectrum of Actinosporin G in MeOD (150 MHz)

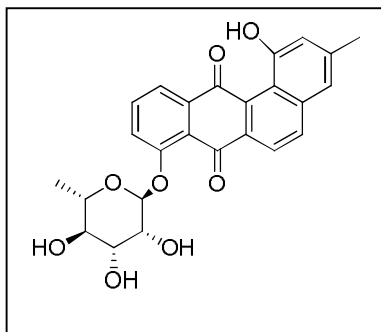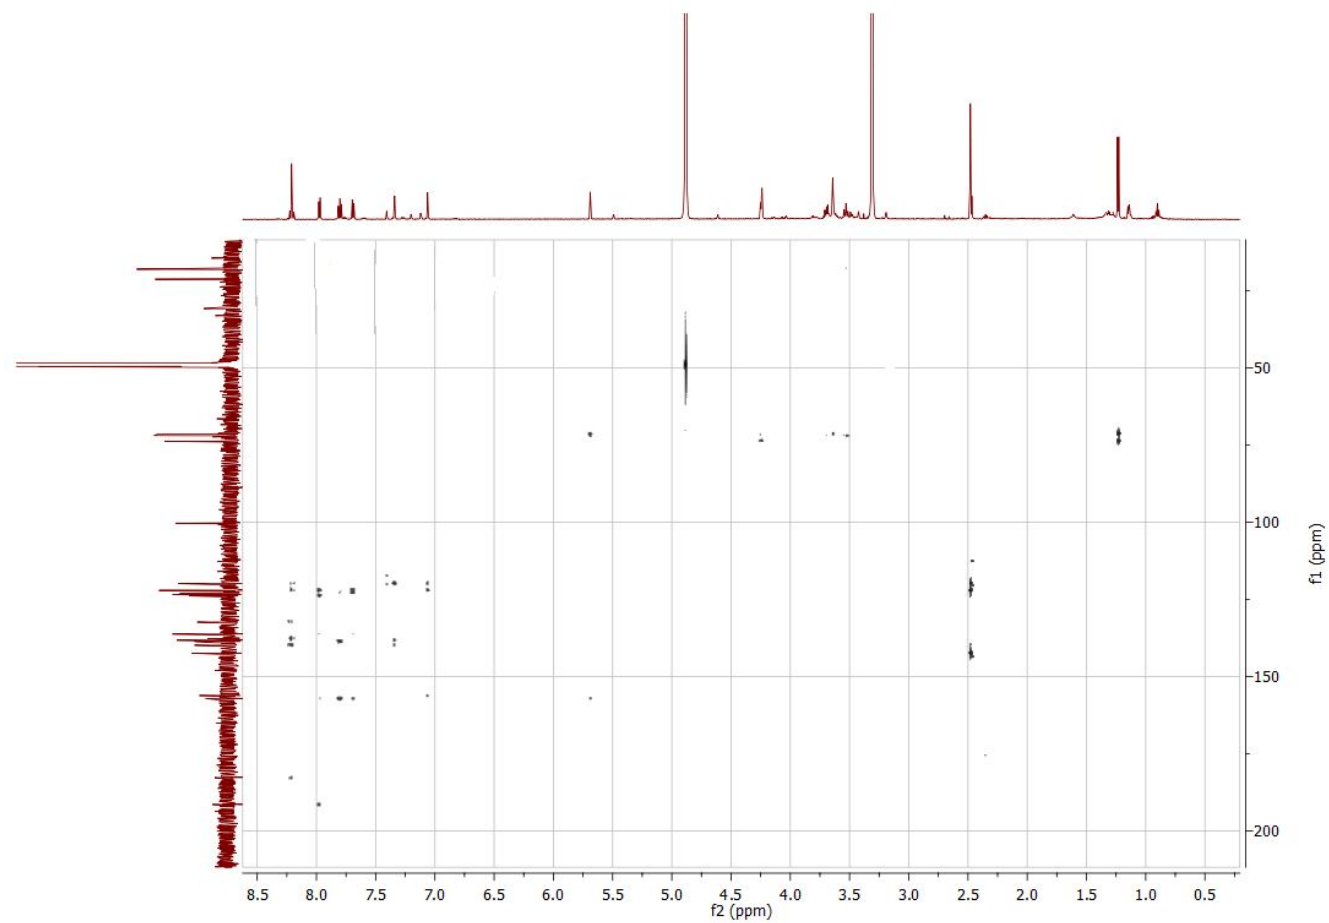

**Figure S21: HMBC spectrum of Actinosporin G in MeOD**
